# Supplementary material
Source: publisher site journal article supplement (https://www.dovepress.com/article/441863)

## Supplementary material

**Figure S1- Insertional pain intensity measured by NPS in the four subgroups, ANOVA,  $f=1.33$ ,  $p=0.268$  (NPS-numerical pain scale)**

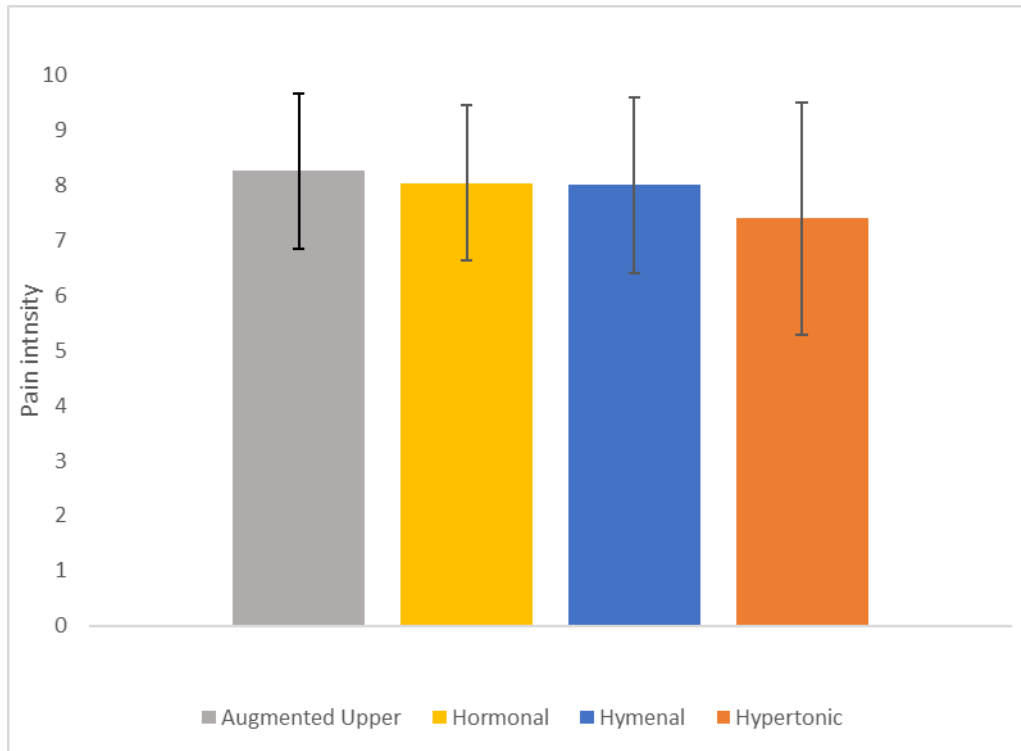

**Figure S2- Q-tip induced pain, measured by NPS in the anterior and posterior vestibule in the four subgroups, ANOVA  $f=66.8$ ,  $p<0.001$ ,  $f=2.6$ ,  $p=0.056$ , respectively (NPS-numerical pain scale)**

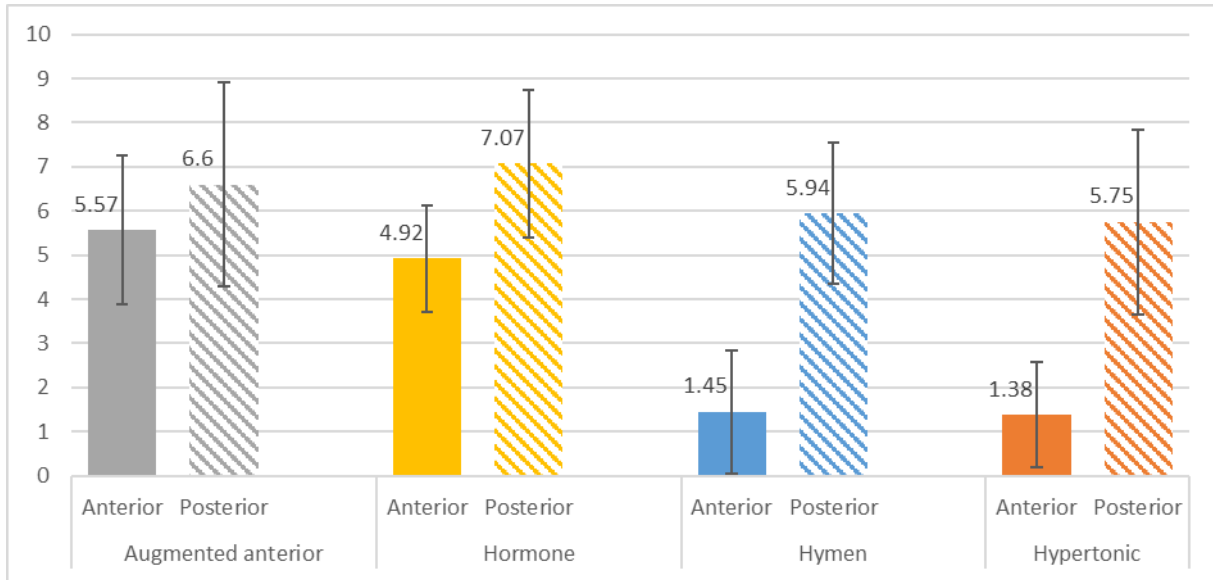

**Figure S3- Muscular pain induced by pressure, measured by NPS in the four subgroups,**  
ANOVA  $f=1.35$ ,  $p=0.261$  (NPS-numerical pain scale)

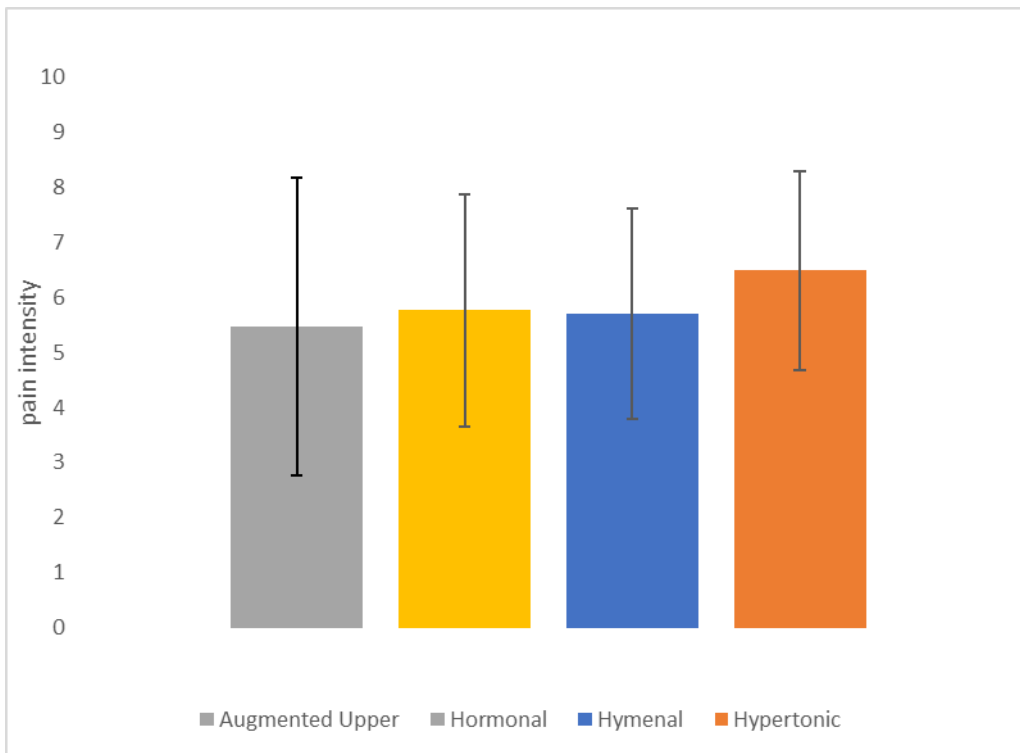

**Figure S4- Tampon-test induced pain measured by NPS in the four subgroups ANOVA**  
f=2.5, p=0.064 (NPS-numerical pain scale)

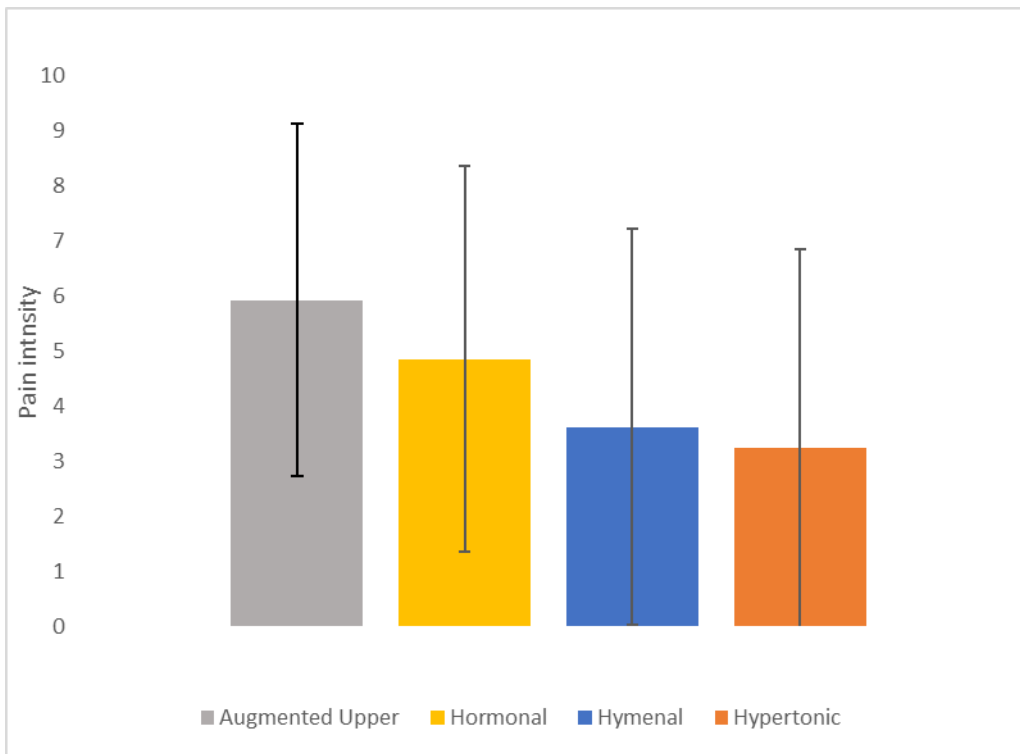

**Figure S5- Pain thresholds in the anterior and posterior vestibule in the four subgroups, measured in KgF, ANOVA  $f=0.31$ ,  $p=0.820$ ,  $f=0.51$ ,  $p=0.674$ , respectively**

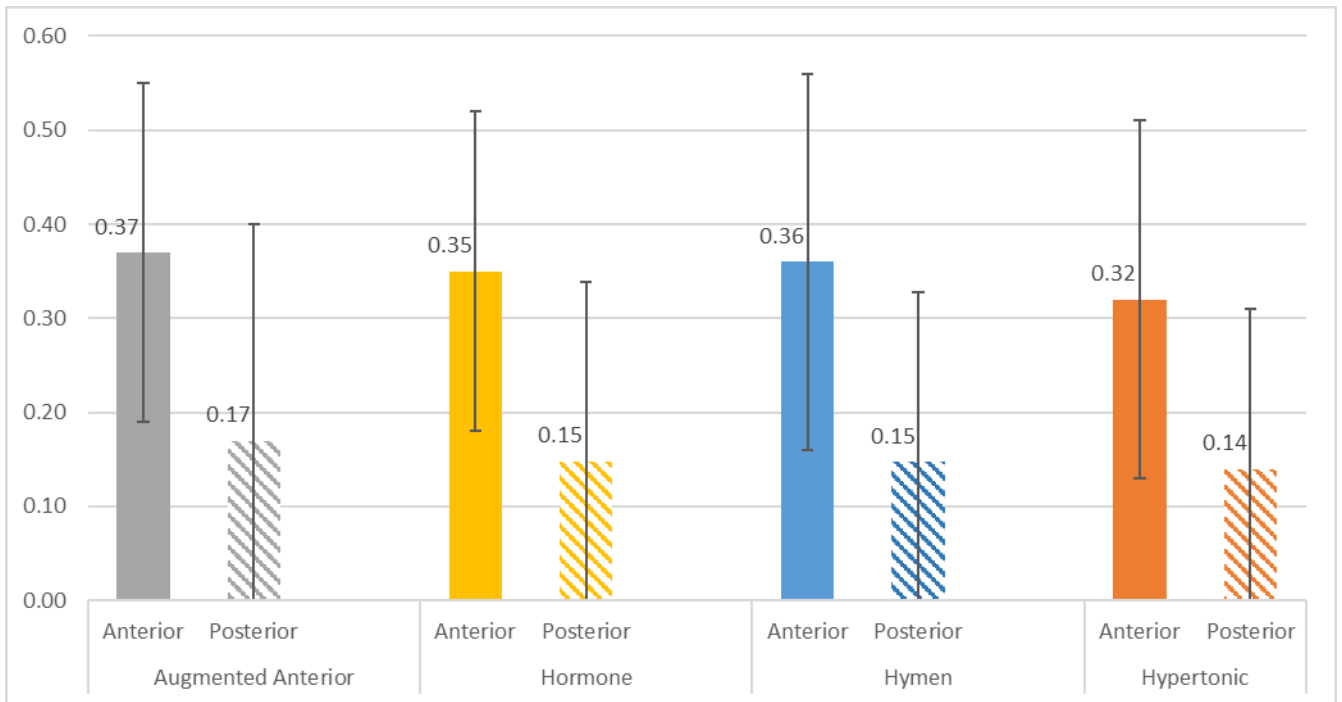

Supplement: Supplementary file 1 [file get_supplementary_file.php]
